# Supplementary material for: CRISPR/Cas9 Targets Chicken Embryonic Somatic Cells In Vitro and In Vivo and generates Phenotypic Abnormalities
Source: PubMed Central journal article supplement (PMC5046125; doi:10.1038/srep34524), 2016-10-03

**CRISPR/Cas9 Targets Chicken Embryonic Somatic Cells *In Vitro* and *In Vivo* and generates Phenotypic Abnormalities.**

Kwaku Dad Abu-Bonsrah<sup>1,2</sup>, Dongcheng Zhang<sup>1,2</sup> and Donald F. Newgreen<sup>2</sup>

<sup>1</sup>Department of Paediatrics, University of Melbourne, Parkville 3052, Australia

<sup>2</sup>Murdoch Childrens Research Institute, Royal Children's Hospital, Parkville, 3052, Australia

**Supplementary Table 1: Genes mutated or detected in this study**

| Gene                               | Chicken c'some | Type, Function                                                           | Developmental expression/role                                                                     | Human or rodent disease relationship                                                 | Present study                                                                                                                                                    |
|------------------------------------|----------------|--------------------------------------------------------------------------|---------------------------------------------------------------------------------------------------|--------------------------------------------------------------------------------------|------------------------------------------------------------------------------------------------------------------------------------------------------------------|
| <i>CDKN1B</i>                      | 1              | Cyclin-dependent kinase inhibitor.<br>Mediates G1 arrest.                | Exp. ubiquitous.<br>Leydig cell dev.                                                              | MEN4                                                                                 | NHEJ deletion DF-1 ±puromycin <i>in vitro</i> .<br>Off-target screen DF-1, DT40 <i>in vitro</i> .                                                                |
| <i>CNN1</i><br><i>Calponin1</i>    | 30             | Neg reg by DROSHA.                                                       | Cytoskeletal -related                                                                             | Severe atrioventricular septal defects                                               | Exp. level after <i>DGCR8</i> NHEJ deletion <i>in ovo</i> .                                                                                                      |
| <i>DGCR8</i>                       | 15micro        | Complex & co-reg with DROSHA.<br>miRNA processing.                       | Exp. wide esp. in neuroepithelium, palate, thymus, limbs.                                         | DiGeorge critical region<br>Het. reduced cell prolifer <sup>n</sup> and neurogenesis | Large transgenic deletion DF-1, DT40 <i>in vitro</i> .<br>NHEJ deletion <i>in ovo</i> .                                                                          |
| <i>DICER</i>                       | 5              | Ribonuclease III.<br>miRNA processing.                                   | Exp. ubiquitous esp. facial, pharyngeal arches and limb bud..                                     | Up-reg. in melanoma<br>Down-reg in breast carcinoma                                  | NHEJ deletion DF-1 <i>in vitro</i> .                                                                                                                             |
| <i>DROSHA</i>                      | 2              | Ribonuclease III. miRNA processing. Complex & co-reg with <i>DGCR8</i>   | Exp. ubiquitous esp. viscera.                                                                     | Premature death<br>Cachexia                                                          | NHEJ deletion DF-1 <i>in vitro</i> .<br>Exp. level after <i>DGCR8</i> NHEJ deletion <i>in ovo</i> .                                                              |
| <i>EZH2</i>                        | 2              | Polycomb family.<br>Regulation DNA methylation.<br>Histone modification. | Exp. neuroepithelium, pharyngeal arches, myotome, later esp. testis.<br>Lung, CNS and B cell dev. | Weaver syndrome                                                                      | NHEJ deletion DF-1 ±puromycin <i>in vitro</i> .                                                                                                                  |
| <i>HIRA</i>                        | 15micro        | Histone cell cycle regulator.                                            | Exp. esp. pharyngeal arches.                                                                      | DiGeorge critical region                                                             | NHEJ deletion DF-1 ±puromycin <i>in vitro</i> .<br>Large transgenic deletion DF-1 <i>in vitro</i> .                                                              |
| <i>KIAA1279</i><br><i>(KIF1BP)</i> | 6              | Regulation DNA methylation.<br>Histone modification.                     | Exp. ubiquitous.                                                                                  | Goldberg-Shprintzen<br>Hirschsprung                                                  | NHEJ deletion DF-1 ±puromycin <i>in vitro</i> .<br>Off-target screen DF-1, DT40 <i>in vitro</i> .<br>Exp. level after <i>DGCR8</i> NHEJ deletion <i>in ovo</i> . |
| <i>NGN2</i>                        | 4              | Regulated by DROSHA/ <i>DGCR8</i> .                                      | Exp. in neural tube, pharyngeal arches                                                            | PNET                                                                                 | Exp. level after <i>DGCR8</i> NHEJ deletion <i>in ovo</i> .                                                                                                      |
| <i>PAX6</i>                        | 5              | Paired box homeotic TF.<br>Regulated by DROSHA / <i>DGCR8</i> .          | Exp. in neural tube, pharyngeal arches, eye.                                                      | Aniridia                                                                             | Exp. level after <i>DGCR8</i> NHEJ deletion <i>in ovo</i> .                                                                                                      |
| <i>MBD3</i>                        | 28micro        | NuRD complex subunit<br>Chromatin alteration, epigenetic markers.        | Exp. wide esp. in brain, pharyngeal arches, intestine                                             | Siver-Russell syndrome                                                               | NHEJ deletion DF-1 ±puromycin <i>in vitro</i> .<br>Exp. level after <i>DGCR8</i> NHEJ deletion <i>in ovo</i> .                                                   |

|              |         |                                                        |                                                                                           |                                |                                                                                                                                                        |
|--------------|---------|--------------------------------------------------------|-------------------------------------------------------------------------------------------|--------------------------------|--------------------------------------------------------------------------------------------------------------------------------------------------------|
| <i>RET</i>   | 6       | GF receptor tyrosine kinase                            | Exp. in PNS, CNS, kidney.<br>Survival, proliferat <sup>n</sup> , different <sup>n</sup> . | MEN2A, MEN2B, Hirschsprung     | HDR gene editing C612R, M918T DF-1 <i>in vitro</i> .<br>Large intragenic deletion DF-1 <i>in vitro</i> .                                               |
| <i>STMN2</i> | 2       | Target of MAPK8<br>Regulation of microtubule stability | Exp. CNS and PNS.<br>Neuronal growth.                                                     | Alzheimer                      | Large intragenic deletion DF-1, DT40 <i>in vitro</i> .<br>NHEJ deletion <i>in ovo</i> .<br>Exp. level after <i>DGCR8</i> NHEJ deletion <i>in ovo</i> . |
| <i>TYRP1</i> | Z       | Tyrosinase-related protein-1, melanosomal tyrosinase   | Exp. epidermal NCC, retina.<br>Melanin biosynthesis.                                      | Rufous oculocutaneous albinism | NHEJ deletion DF-1 ±puromycin <i>in vitro</i> .                                                                                                        |
| <i>YPEL1</i> | 15micro | Centrosomal/nucleolar<br>Regulated by DROSHA /DGCR8    | Exp. in pharyngeal arches.                                                                | DiGeorge critical region       | Exp. level after <i>DGCR8</i> NHEJ deletion <i>in ovo</i> .                                                                                            |

Gene data from: <http://www.ncbi.nlm.nih.gov/gene/>

Expression data from:

<http://www.proteinatlas.org/search/>

[http://www.emouseatlas.org/emagewebapp/pages/emage\\_gene\\_browse.jsf](http://www.emouseatlas.org/emagewebapp/pages/emage_gene_browse.jsf)

Disease data from: <http://www.genecards.org/cgi-bin/carddisp.pl?gene=>

miRNA target data: <http://www.targetscan.org>

<http://www.microrna.org>

**Supplementary Table 2: Oligonucleotides for cloning sgRNA into CRISPR/Cas9 vector**

| Gene or locus      |          | Direction | Sequence 5' to 3'        |
|--------------------|----------|-----------|--------------------------|
| <i>RET</i> exon 16 | sgRNA #1 | FP1       | CCGGAGGGTCGGATACCTGTAAA  |
|                    |          | RP1       | AACTTTAACAGGTATCCGACCCT  |
|                    | sgRNA #2 | FP2       | CCGGTCTATGGCCATCCATTTAAC |
|                    |          | RP2       | AAACGTAAATGGATGGCCATAGA  |
| <i>RET</i> exon 10 | sgRNA #1 | FP1       | CCGGTCACAATAACAGTTCTGTCT |
|                    |          | RP1       | AAACAGACAGAACTGTTATTGTGA |
| <i>KIAA1279</i>    | sgRNA #1 | FP1       | CCGGGCGGAACTTCTCGCACGCCG |
|                    |          | RP1       | AAACCGGCGTGCGAGAAGTTCCGC |
|                    | sgRNA #2 | FP2       | CCGGCGGCGGCGACAAGATGGCGG |
|                    |          | RP2       | AAACCCGCCATCTTGTCGCCGCCG |
| <i>MBD3</i>        | sgRNA #1 | FP1       | CCGGGCACCTTTGACTTCCGCACG |
|                    |          | RP1       | AAACCGTGCGGAAGTCAAAGGTGC |
|                    | sgRNA #2 | FP2       | CCGGGTCAAAGGTGCTCAGGTCCA |
|                    |          | RP2       | AACTGGACCTGAGCACCTTTGAC  |
| <i>EZH2</i>        | sgRNA #1 | FP1       | CCGGACACGTTTTCGCCAACAAAT |
|                    |          | RP1       | AAACATTTGTTGGCGAAAACGTGT |
|                    | sgRNA #2 | FP2       | CCGGCTGAGAAAGGACCAATTTGT |

|                               |          |     |                           |
|-------------------------------|----------|-----|---------------------------|
|                               |          | RP2 | AAACACAAATTGGTCCTTTCTCAG  |
| <i>CDKN1β</i>                 | sgRNA #1 | FP1 | CCGGCCCTACCCTGGAGCGCATGG  |
|                               |          | RP1 | AAACCCATGCGCTCCAGGGTAGGG  |
|                               | sgRNA #2 | FP2 | CCGGCCGCGCCTCCATGCGCTCCA  |
|                               |          | RP2 | AAACTGGAGCGCATGGAGGCGCGG  |
| <i>Stathmin-like 2 exon 1</i> | sgRNA #1 | FP1 | CCGGATTGCTGTTTTAGCCATGGT  |
|                               |          | RP1 | AAACACCATGGCTAAAACAGCAAT  |
|                               | sgRNA #2 | FP2 | CCGG AGCGCCTGCACATCCCACCA |
|                               |          | RP2 | AAACTGGTGGGATGTGCAGGCGCT  |
| <i>Stathmin-like 2 exon 3</i> | sgRNA #1 | FP1 | CCGGTGAGGAGATCCAGAAAAAGC  |
|                               |          | RP1 | AAACGCTTTTTCTGGATCTCCTCA  |
|                               | sgRNA #2 | FP2 | CCGGCGGCAGCCTCCAGCTTTTTTC |
|                               |          | RP2 | AAACGAAAAAGCTGGAGGCTGCCG  |
| <i>DGCR8 exon 2</i>           | sgRNA #1 | FP1 | CCGGGTCTTCGTGCACCCAAAACA  |
|                               |          | RP1 | AAACTGTTTTGGGTGCACGAAGAC  |
|                               | sgRNA #2 | FP2 | CCGGCACTTGTTTCTCCATCAGAC  |
|                               |          | RP2 | AAACGTCTGATGGAGAAACAAGTG  |
| <i>HIRA</i>                   | sgRNA #1 | FP1 | CCGGTATGGCTCCTGTCCTGAAAAG |
|                               |          | RP1 | AAACCTTTCAGGACAGGAGCCATA  |
| <i>TYRP1</i>                  | sgRNA #1 | FP1 | CCGGACCATTGAGTCTCTGAGAAG  |
|                               |          | RP1 | AAACCTTCTCAGAGACTCAATGGT  |

**Supplementary Table 3: Primers for On-Target analysis.**

| Gene or locus                  | Direction | Sequence 5' to 3'         |
|--------------------------------|-----------|---------------------------|
| <i>RET</i> exon 16             | FP        | AACAGATCATCTGTCAGCTTGTGT  |
|                                | RP        | TCCTCAGATTTAATTAATGGCA    |
| <i>RET</i> exon 10             | FP        | CTACTCCAGTGCTCAGAAATCCAT  |
|                                | RP        | GTCTCCATGCACAAGTCAATATGC  |
| <i>KIAA1279</i>                | FP        | GCCAGGGCCCTCGAGTAACCGCG   |
|                                | RP        | GCGCAGCCCCGCCCACCTGGGC    |
| <i>MBD3</i>                    | FP        | TGCACTTATTCTGCTAATTATGCTG |
|                                | RP        | TGGACAGGCTTTGTTCTTGAGA    |
| <i>EZH2</i>                    | FP        | ATGGCCTGTTAATTTGTAATAAAAT |
|                                | RP        | TTGATTCAATCACATACAAATGTA  |
| <i>CDKN1B</i>                  | FP        | TCGGCTGCTCCCCTCCGGAGCCG   |
|                                | RP        | GCCTGAAGTAGAAGTCGGGCGAG   |
| <i>Stathmin</i> -like 2 exon 1 | FP        | GTGGATCAATATTTAATGCCCGGAG |
|                                | RP        | TGATCTCAGATCGTTAAAAGAGCC  |
| <i>Stathmin</i> -like 2 exon 3 | FP        | TAGTCTGTATTTCTGATCGTACACT |
|                                | RP        | CAAGTTGCTGAAAGAAAATAAACT  |
| <i>DGCR8</i> exon 2            | FP        | GGGATCATTGGACATTTCTAGTTC  |

|              |    |                           |
|--------------|----|---------------------------|
|              | RP | ACAACAGATGAAGACAAAAAGCAC  |
| <i>HIRA</i>  | FP | TGTAAGTGTATCAGAATGGCCTCT  |
|              | RP | CCAGAGAAAGTTCACTGATTTCCA  |
| <i>TYRP1</i> | FP | CTGGACTGGAGGTTTGTATTTCTT  |
|              | RP | CTAGGTGCATTAATAATCAACATGC |

**Supplementary Table 4. Primers for Off-target Analysis and their Off-target sequence. Mismatch nucleotides are in red**

| Gene or locus                      | Off-Target sequence      | Direction | Sequence 5' to 3'        |
|------------------------------------|--------------------------|-----------|--------------------------|
| <i>RET</i> exon 16 OT              | AGGGTCAGCCACCTGTAAAGGG   | T7 FP     | AGCACTCGAGTCAGGAGACTTAAT |
|                                    |                          | T7 RP     | ATTGGAGGACTTCTTGTCTAGGTG |
| <i>RET</i> exon 10 OT1             | TCAAATGACAGTTCTGTCTCAG   | T7 FP     | GAGAAACAGGAAAATAGGAACAGG |
|                                    |                          | T7 RP     | CAGCTACTGTGACACTTGATTCAG |
| <i>RET</i> exon 10 OT2             | CCATCATAACAGTTCTGTCTCAG  | T7 FP     | GACCTCAGCATAATCACATTGTTT |
|                                    |                          | T7 RP     | TATCCTATGCTTTACACTCGTCCA |
| <i>KIAA1279</i> OT                 | GTGGAACCTCTCGCACGCAAGCGG | T7 FP     | AAATAGGGGAGAAAAATGAGGAAG |
|                                    |                          | T7 RP     | AATCCCGCTGGTAAAATATGTATG |
| <i>CDKN1<math>\beta</math></i> OT  | CAGCAACCTGGAGCGCATGGGAG  | T7 FP     | CAAGGCACAAAGTCTCATTGTTT  |
|                                    |                          | T7 RP     | CGTTGTCTTCATCCTTAGGTTTTT |
| <i>Stathmin</i> -like 2 exon 1 OT1 | AGCTCCTGCACATCCCACCTGGG  | T7 FP     | TTTAAAAGGTAGTCCTGCTGCTCT |
|                                    |                          | T7 RP     | GAGATTTTGCAGTTTCACAGAAGA |
| <i>Stathmin</i> -like 2 exon 1 OT2 | ATCGCCACCACATCCCACCAAGG  | T7 FP     | TCCACGAAAGTATGCTGAGATAAA |
|                                    |                          | T7 RP     | CTGGGAAAAGGATTACATTCAGAG |
| <i>Stathmin</i> -like 2 exon 3 OT  | TTATAAGATTCAGAAAAAGCTGG  | T7 FP     | CACCCACAGTCAACTTATTTTTGT |
|                                    |                          | T7 RP     | AAATGAGAGTTCCACAATGCAGTA |



**Supplementary Table 5: Primers used in qPCR**

| Gene or locus   | Direction | Sequence 5' to 3'        | Product size |
|-----------------|-----------|--------------------------|--------------|
| <i>DROSHA</i>   | FP        | CATGGATCAAGTGGGGACT      | 100 bp       |
|                 | RP        | GGCCTTGCCTGTCGTTTTTC     |              |
| <i>NeuroG2</i>  | FP        | CACAACACTACATCTGGGCGCT   | 175 bp       |
|                 | RP        | GCGATAAAGTGCAGGCGTAG     |              |
| <i>DGCR8</i>    | FP        | GCATGAATATATGCAACGAGTCC  | 75 bp        |
|                 | RP        | GGCTCACTTGGGTTCTCACA     |              |
| ACTB            | FP        | GTATGTGCAAGGCCGTTTC      | 92 bp        |
|                 | RP        | AACCATCACACCCTGATGTCT    |              |
| RPL32           | FP        | GTTACGACCCATCAGCCCTTG    | 93 bp        |
|                 | RP        | CATGATGCCGAGAAGGAGATGG   |              |
| <i>PAX6</i>     | FP        | GCGCAGTATAAACGAGAGTGC    | 187 bp       |
|                 | RP        | TCAGCATCCTTAGCTTGTCTGT   |              |
| <i>YPEL1</i>    | FP        | GAGCCACCTAGCCAATCAC      | 132 bp       |
|                 | RP        | ACAGCCACATTTACCACAG      |              |
| <i>STMN2</i>    | FP        | CGAGGAGAGGAGAAAGTCCCA    | 150 bp       |
|                 | RP        | TGTTCCATTTTCAGTATCAGCTTT |              |
| <i>KIAA1279</i> | FP        | CTACATCCAGGCCAGAACA      | 141 bp       |
|                 | RP        | CTGGGATCCAGGGGAGGATT     |              |

|             |    |                          |        |
|-------------|----|--------------------------|--------|
| <i>MBD3</i> | FP | TCCAACCAAGCCAAAGGCAA     | 125 bp |
|             | RP | GGATCACTCTTCACCTTATTGCTG |        |
| <i>CNN1</i> | FP | ATAAGCTGGAGAACATTGGGAAC  | 97 bp  |
|             | RP | GTGTTCTCGAAGAGGTCGTTG    |        |

S1A

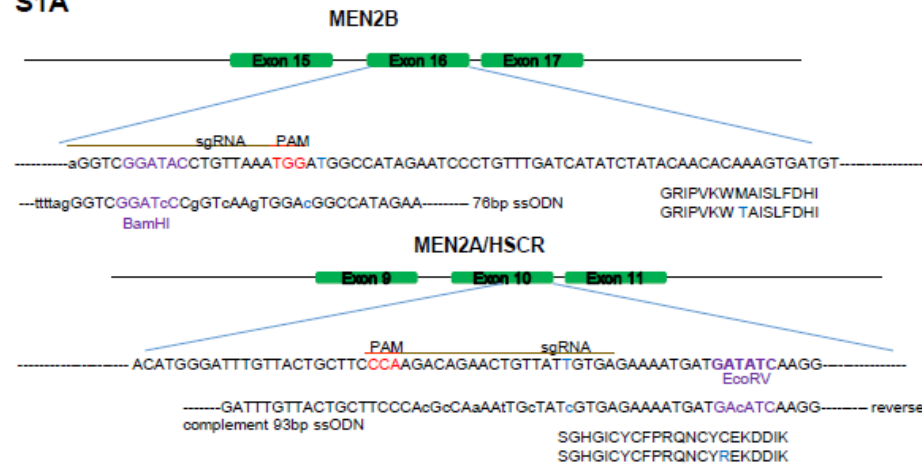

B

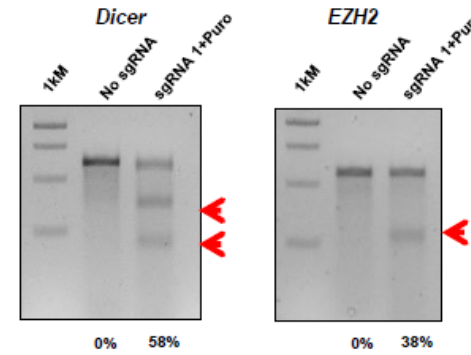

C

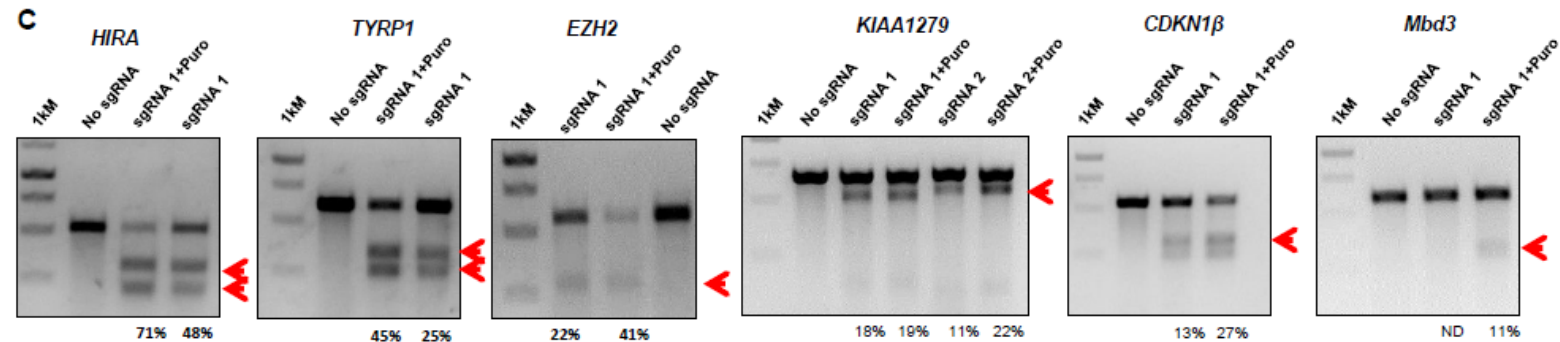

**Supplementary Figure 1A.** Diagram of sgRNAs targeting sites on exon 10 (MEN2A/HSCR) and exon 16 (MEN2B) of the *RET* gene and the corresponding ssODN. Exons are shown in green boxes with location of sgRNA and sequences of PAM in red. Created (BamHI) and disrupted (EcoRV) restriction enzyme site are in purple. Desired base pair correction and its corresponding amino acid is represented in blue. **(B)** Frequency (%) of NHEJ mutations mediated by *Dicer* and *EZH2*-targeting sgRNA-Cas9 system in DF-1 cells with puromycin selection, by PCR and T7E1 assay. **(C)** Frequency (%) of NHEJ mutations mediated by *HIRA*, *TYRP1*, *EZH2*, *KIAA1279*, *CDKN1β*, and *Mbd3*-targeting sgRNA-Cas9 system in DF-1 cells with and without puromycin selection by PCR and T7E1 assay. Arrow indicates the NHEJ mutation created by the CRISPR/Cas9 system. 1kM-1 kbp DNA ladder. ND=not detected.

## S1D

### KIAA1279

|                                                                                                                       |                 |      |
|-----------------------------------------------------------------------------------------------------------------------|-----------------|------|
| GGCGGCGGCGACAAG <b>ATG</b> GCG GCG GCG GGT GGC GGG TGG GCC GCG GCG TGC GAG AAG TTC CGC AGC GCCAGGACGCTGTCGGCCGTGGA    | (wild type)     | (x1) |
| M A A A G G G W A A A C E K F R S A R T L S A V                                                                       |                 |      |
| GGCGGCGGCGACAAG <b>ATG</b> GCG GCG GCG GGT GGC GGG TGG GCC GCG G---TG CGA GAA GTT CCG CAG CGC CAGGACGCTGTCGGCCGTGGA   | (2bp deletion)  | (x1) |
| M A A A G G G W A A V R E V P Q R Q D A V G R G                                                                       | (frameshift)    |      |
| GGCGGCGGCGACAAG <b>ATG</b> GCG GCG GCG GGT GGC GGG TGG GCC GCG G---GT GCG AGA AGT TCC GCA GCG CCAAGGACGCTGTCGGCCGTGGA | (1bp deletion)  | (x2) |
| M A A A G G G W A A G A R S S A A P G R C R P W                                                                       | (frameshift)    |      |
| GGCGGCGGCGACAAG <b>ATG</b> GCG GCG GCG GGT GGC GGG TG---C GAG AAG TTC CGC AGC GCCAGGACGCTGTCGGCCGTGGA                 | (12bp deletion) | (x1) |
| M A A A G G G C E K F R S A R T L S A V                                                                               | (frameshift)    |      |
| -----CGGCCGTGGA                                                                                                       | (33bp deletion) | (x1) |
| R P W                                                                                                                 | (ORF disrupted) |      |
| GGCGGCGGCGACAAG <b>ATG</b> GCG GCG GCG GGT GGC GGG TGG GCC GCG G---GA GAA GTT CCG CAG CGC CAGGACGCTGTCGGCCGTGGA       | (3bp deletion)  | (x1) |
| M A A A G G G W A A G E V P Q R Q D A V G R G                                                                         | (frameshift)    |      |
| GGCGGCGGCGACAAG-----TGC GAG AAG TTC CGC AGC GCCAGGACGCTGTCGGCCGTGGA                                                   | (33bp deletion) | (x1) |
| C E K F R S A R T L S A V                                                                                             | (ORF disrupted) |      |

### CDKN1β

|                                                                                                              |                                  |      |
|--------------------------------------------------------------------------------------------------------------|----------------------------------|------|
| GAGGGGGAG <b>ATG</b> TCA AAC GTC CGC ATT TCT AAT GGG AGC CCT ACC CTG GAG CGC ATG GAGGCGCGGCACTCGGAGTAC-      | (wild type)                      | (x1) |
| M S N V R I S N G S P T L E R M E A R Q S E Y                                                                |                                  |      |
| GAGGGGGAG <b>ATG</b> TCA AAC GTC CGC ATT TCT AAT GGG AGC CCT ACC CTG GAG CGC <b>AT</b> GAGGCGCGGCACTCGGAGTAC | (1bp insertion)                  | (x1) |
| M S N V R I S N G S P T L E R N G G A A V G V                                                                | (frameshift)                     |      |
| GAGGGGGAG <b>ATG</b> TCA AAC GTC CGC ATT TCT AAT GGG AGC CCT ACC CTG G---AT GAGGCGCGGCACTCGGAGTAC            | (3bp deletion)                   | (x1) |
| M S N V R I S N G S P T L D G G A A V G V                                                                    | (frameshift)                     |      |
| GAGGGGGAG <b>ATG</b> TCA AAC GTC CGC ATT TCT AAT GGG AGC CCT ACC C---TG GAGGCGCGGCACTCGGAGTAC                | (9bp deletion)                   | (x1) |
| M S N V R I S N G S P T L E A R Q S E Y                                                                      | (frameshift)                     |      |
| GAGGGGGAG <b>ATG</b> TCA AAC GTC CGC ATT TCT AAT GGG AGC CCT <b>CC</b> CT---C---C---AT GAGGCGCGGCACTCGGAGTAC | (6bp deletion and 3bp insertion) | (x1) |
| M S N V R I S N G S P A L H G G A A V G V                                                                    | (frameshift)                     |      |
| GAGGGGGAG <b>ATG</b> TCA AAC GTC CGC ATT TCT AAT GGG AGC CCT ACC C---CG CAT GAGGCGCGGCACTCGGAGTAC            | (3bp deletion)                   | (x1) |
| M S N V R I S N G S P T P H G G A A V G V                                                                    | (frameshift)                     |      |

### MBD3

|                                                                                                           |                                  |      |
|-----------------------------------------------------------------------------------------------------------|----------------------------------|------|
| GCAGCAAAACCCAGCTGGCTCGCTACCTGGGCACTCC <b>ATG</b> GAC CTG AGC ACC TTT GAC TTC CGCACGGGAAAAATGCTGATGAGCAAA- | (wild type)                      | (x3) |
| M D L S T F D F R T G K M L M S K                                                                         |                                  |      |
| GCAGCAAAACCCAGCTGGCTCGCTACCTGGGCACTCC <b>ATG</b> GAC ACC TTT GAC TTC CGCACGGGAAAAATGCTGATGAGCAAA          | (18bp insertion)                 | (x1) |
| M L M S K                                                                                                 | (ORF disrupted)                  |      |
| GCAGCAAAACCCAGCTGGCTCGCTACCTGGGCACTCC <b>ATG</b> GAC---TGACACCTTTGACTTCGACGGGAAAAATGCTGATGAGCAAA          | (3bp deletion)                   | (x1) |
| M L M S K                                                                                                 | (ORF disrupted)                  |      |
| GCAGCAAAACCCAGCTGGCTCGCTACCTGGGCACTCC <b>ATG</b> GGG---G CAC CTT TGACTTCCGACGGGAAAAATGCTGATGAGCAAA        | (3bp deletion and 1bp insertion) | (x1) |
| M G H L stop                                                                                              | (ORF disrupted)                  |      |
| GCAG-----GGAAAAATGCTGATGAGCAAA                                                                            | (65bp deletion)                  | (x2) |
| M L M S K                                                                                                 | (ORF disrupted)                  |      |
| GCAGCAAAACCCAGCTGGCTCGCTACCTGGGCACTCC <b>ATG</b> GAC---ACCTGAGCACCTTTGACTTCGACGGGAAAAATGCTGATGAGCAAA      | (2bp deletion)                   | (x1) |
| M L M S K                                                                                                 | (ORF disrupted)                  |      |
| GCAGCAAAACCCAGCTGGCTCGCTACCTGGGCACTCC <b>ATG</b> GAC-----TTGACTTCCGACGGGAAAAATGCTGATGAGCAAA               | (18bp deletion)                  | (x1) |
| M L M S K                                                                                                 | (ORF disrupted)                  |      |

Supplementary Figure 1D. NHEJ mutations in *KIAA1279*, *CDKN1β* and *Mbd3* mediated by sgRNA-Cas9 in DF-1 cells. Red dashes and letters in red in the DNA sequences denote deleted nucleotides and inserted nucleotides respectively, and bold and underlined ATG indicates the translational initiation codon.

# S1E

## mCherry+

|                                                                                                                 |                                   |       |
|-----------------------------------------------------------------------------------------------------------------|-----------------------------------|-------|
| GGCGGCGGCGACAAG <b>ATG</b> GCG GCG GCG GGT GCC GGG TGG GCC GCG GCG TGCGAGAAGTTCCGACGCGCCAGGACGCTGTCGGCCGTGGA    | ( wild type)                      | (x16) |
| M A A A G G G W A A A C E K F R S A R T L S A V                                                                 |                                   |       |
| GGCGGCGGCGA-----GAAGTTCCGACGCGCCAGGACGCTGTCGGCCGTGGA                                                            | (42bp deletion)                   | (x3)  |
|                                                                                                                 | (ORF disrupted)                   |       |
| GGCGGCGGCGACAAG <b>ATG</b> GCG-----CGAAGTTCCGACGCGCCAGGACGCTGTCGGCCGTGGA                                        | (31bp deletion and 1bp insertion) | (x1)  |
| M A R S S A A P G R C R P W                                                                                     | (frameshift)                      |       |
| GGCGGCGGCGACAAG <b>ATG</b> GCG GCG GCG GGT GCC GGG TGG GCC GCG G-----GTGCGAGAAGTTCCGACGCGCCAGGACGCTGTCGGCCGTGGA | (1bp deletion)                    | (x2)  |
| M A A A G G G W A A G A R S S A A P G R C R P W                                                                 | (frameshift)                      |       |
| GGCGGCGGCGACAAG <b>ATG</b> GCG GCG GCG GGT GCC GGG TGG GCC GCG G-----GCGAGAAGTTCCGACGCGCCAGGACGCTGTCGGCCGTGGA   | (3bp deletion)                    | (x1)  |
| M A A A G G G W A A G E K F R S A R T L S A V                                                                   | (frameshift)                      |       |
| GGCGGCGGCGACAAG <b>ATG</b> GCG GCG GCG GGT GCC GGG TGG GCC GCG-----TGCGAGAAGTTCCGACGCGCCAGGACGCTGTCGGCCGTGGA    | (3bp deletion)                    | (x1)  |
| M A A A G G G W A A C E K F R S A R T L S A V                                                                   | (frameshift)                      |       |
| -----                                                                                                           | (102bp deletion)                  | (x1)  |
|                                                                                                                 | (ORF disrupted)                   |       |
| GGCGGCGGCGACAAG-----                                                                                            | (75bp deletion)                   | (x1)  |
|                                                                                                                 | (ORF disrupted)                   |       |

## GFP+

|                                                                                                                 |                 |       |
|-----------------------------------------------------------------------------------------------------------------|-----------------|-------|
| GGCGGCGGCGACAAG <b>ATG</b> GCG GCG GCG GGT GCC GGG TGG GCC GCG GCG TGCGAGAAGTTCCGACGCGCCAGGACGCTGTCGGCCGTGGA    | (wild type)     | (x24) |
| M A A A G G G W A A A C E K F R S A R T L S A V                                                                 |                 |       |
| GGC-----AGCGCCAGGACGCTGTCGGCCGTGGA                                                                              | (60bp deletion) | (x1)  |
|                                                                                                                 | (ORF disrupted) |       |
| GGCGGCGGCGACAAG-----TGCGAGAAGTTCCGACGCGCCAGGACGCTGTCGGCCGTGGA                                                   | (33bp deletion) | (x1)  |
|                                                                                                                 | (ORF disrupted) |       |
| GGCGGCGGCG-----CCAGGACGCTGTCGGCCGTGGA                                                                           | (57bp deletion) | (x1)  |
|                                                                                                                 | (ORF disrupted) |       |
| GGCGGCGGCGACAAG <b>ATG</b> GCG GCG GCG GGT GCC GGG TGG GCC GCG-----TGCGAGAAGTTCCGACGCGCCAGGACGCTGTCGGCCGTGGA    | (3bp deletion)  | (x1)  |
| M A A A G G G W A A C E K F R S A R T L S A V                                                                   | (frameshift)    |       |
| GGCGGCGGCGACAAG <b>ATG</b> GCG GCG GCG GGT GCC GGG TGG GCC GCG GCG C GTGCGAGAAGTTCCGACGCGCCAGGACGCTGTCGGCCGTGGA | (1bp insertion) | (x1)  |
| M A A A G G G W A A A V R E V P Q R Q D A V G R G                                                               | (frameshift)    |       |

**Supplementary Figure 1E :** Sequence analysis of NHEJ mutation mediated by *KIAA1279*-targeting sgRNA-Cas9 system in chicken cells *in ovo*. Red dashes and letters in red in the DNA sequences denote deleted nucleotides and inserted nucleotides respectively, and bold and underlined ATG indicates the translational initiation codon in the gene.

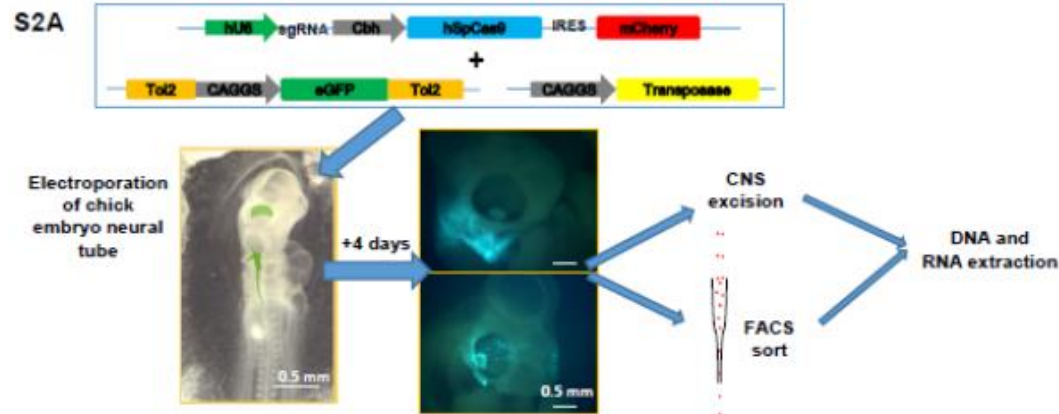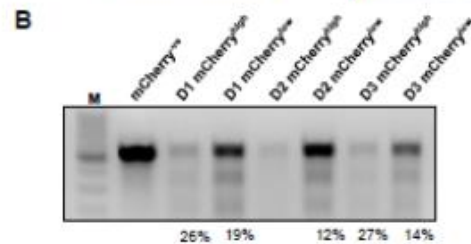

**D1** GAT GCT CTG CTG GAA GAG GGT CTT CGT GCA CCC AAA ACA **AGG** AGA GTA GAA AAT GAGAAATACGGTGGTGAAAGT wild type (x1)  
 D A L L E E G L R A P K T R R V E N  
 GAT GCT CTG CTG GAA GAG GGT CTT CGT GCA CCC ~~ACA~~ **AGG** AGA GTA GA A AAT GAGAAATACGGTGGTGAAAGT (3bp deletion) (x1)  
 D A L L E E G L R A P T R R V E N  
 GAT GCT CTG CTG GAA GAG GGT CTT CGT GCA CCC **AAA AAC AAG** GAG AGT AGA AAA IGAGAAATACGGTGGTGAAAGT(1bp insertion) (x1)  
 D A L L E E G L R A P K N K E S R K stop  
 GAT GCT CTG CTG GAA GAG GGT CTT CGT GCA CCC AAA **GGT GAG** GGA GAG TAG AAAATGAGAAATACGGTGGTG(3bp deletion/2bp insertions) (x1)  
 D A L L E E G L R A P K G E G E stop

**D2** GAT GCT CTG CTG GAA GAG GGT CTT CGT GCA CCC AAA ACA **AGG** AGA GTA GAA AAT GAGAAATACGGTGGTGAAAGT wild type (x7)  
 D A L L E E G L R A P K T R R V E N  
 GAT GCT CTG CTG GAA GAG GGT CTT CGT GCA CCC AA ~~G~~ GAG AGT AGA AAA IGA GAAATACGGTGGTGAAAGT (5bp deletion) (x2)  
 D A L L E E G L R A P K E S R K stop

**Supplementary Figure 2 (A)** A schematic representation of the *in ovo* electroporation technique and FACS. The mCherry CRISPR/Cas9 and the Tol2-GFP/transposase plasmids were co-injected or injected separately into the neural tube lumen (shaded green) of E1.5 chick embryos and electroporated. Embryos were harvested at stage E5.5, dissociated by collagenase/dispase and sorted by FACS or, alternatively, surrounding tissues were removed leaving the CNS for analysis. Representative images showing the extent of the electroporation and distribution of GFP-labelled cells was variable. **(B)** Frequency of NHEJ mutation mediated by exon 2 of DGCR8-targeting sgRNA-CRISPR/Cas9 system in chick embryo by PCR and T7E1 assay and sequence analysis of cloned DGCR8-1 (D8-1) and D8-2 sorted cells. Red dashes and letters in red in the DNA sequences denote deleted nucleotides and inserted nucleotides respectively, and bold indicates the PAM sequence with underlined nucleotide indicating the stop codon. mCherry<sup>low</sup> – mCherry low, mCherry<sup>high</sup> – mCherry high, mCherry<sup>ve</sup> -mCherry negative, 1M- 100 bp DNA ladder, ND=not detected.



S4A

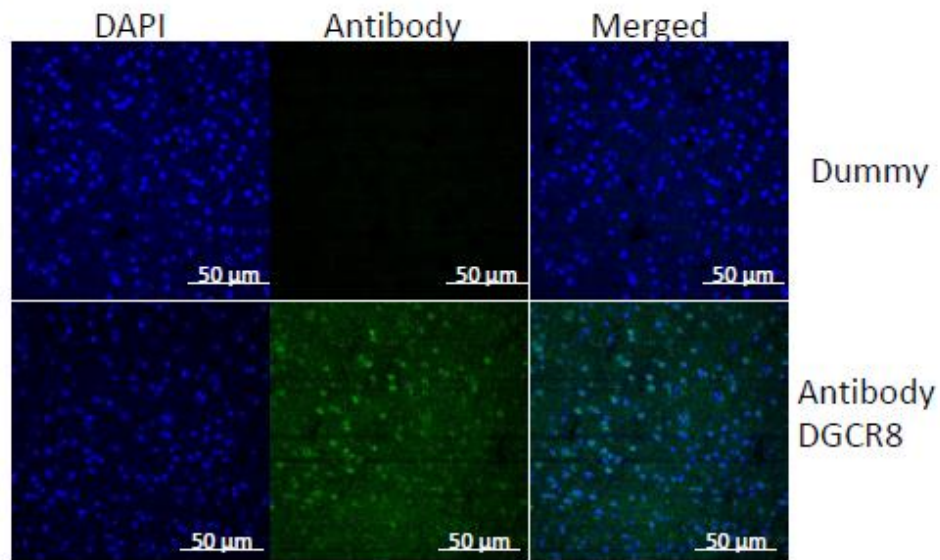

**Supplementary Figure 4 (A)** Immunofluorescence images of single and merged channels of the indicated markers from frozen sections of postnatal mouse brain. **(B)** Validation of the Anti-DGCR8 antibody on chick embryonic brains and postnatal mouse brain by western blot, showing expected 87 and 117 kD bands. The previously observed band at 65 kD has not been identified by the supplier (Abcam).

S4B

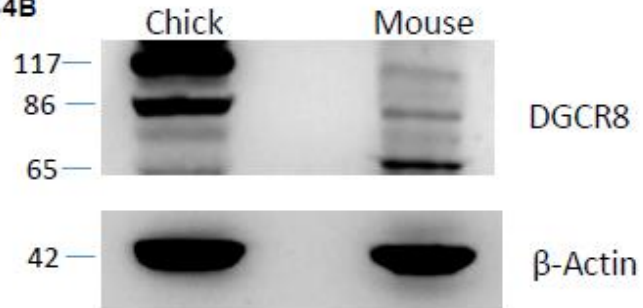

Supplement: srep34524-s1.pdf [file srep34524-s1.pdf]
